# Supplementary material for: Western diet induces severe nonalcoholic steatohepatitis, ductular reaction, and hepatic fibrosis in liver CGI-58 knockout mice
Source: PubMed Central journal article supplement (PMC7070035; doi:10.1038/s41598-020-61473-6), 2020-03-13
Supplement: 41598_2020_61473_MOESM1_ESM.pdf [file 41598_2020_61473_MOESM1_ESM.pdf]

## **SUPPLEMENTAL DATA**

### **Western diet induces severe nonalcoholic steatohepatitis, ductular reaction, and hepatic fibrosis in liver CGI-58 knockout mice**

Pan Yang<sup>1,2,3</sup>, Youlin Wang<sup>2,3</sup>, Weiqing Tang<sup>3</sup>, Weiwei Sun<sup>1</sup>, Yinyan Ma<sup>3</sup>, Shu Lin<sup>1</sup>, Jia Jing<sup>4</sup>, Long Jiang<sup>5</sup>, Hang Shi<sup>4</sup>, Zhiyuan Song<sup>1\*</sup>, and Liqing Yu<sup>2,3,5\*</sup>

<sup>1</sup>Department of Cardiology, Southwest Hospital, Army Medical University (The Third Military Medical University), Chongqing, 400038, China; <sup>2</sup>Center for Molecular and Translational Medicine, Institute for Biomedical Sciences, Georgia State University, Atlanta, GA 30303, USA; <sup>3</sup>Department of Animal and Avian Sciences, University of Maryland, College Park, MD 20742, USA; <sup>4</sup>Department of Biology, Georgia State University, Atlanta, GA 30303, USA; and <sup>5</sup>Division of Endocrinology, Diabetes, and Nutrition, Department of Medicine, University of Maryland School of Medicine, Baltimore, MD 21201, USA.

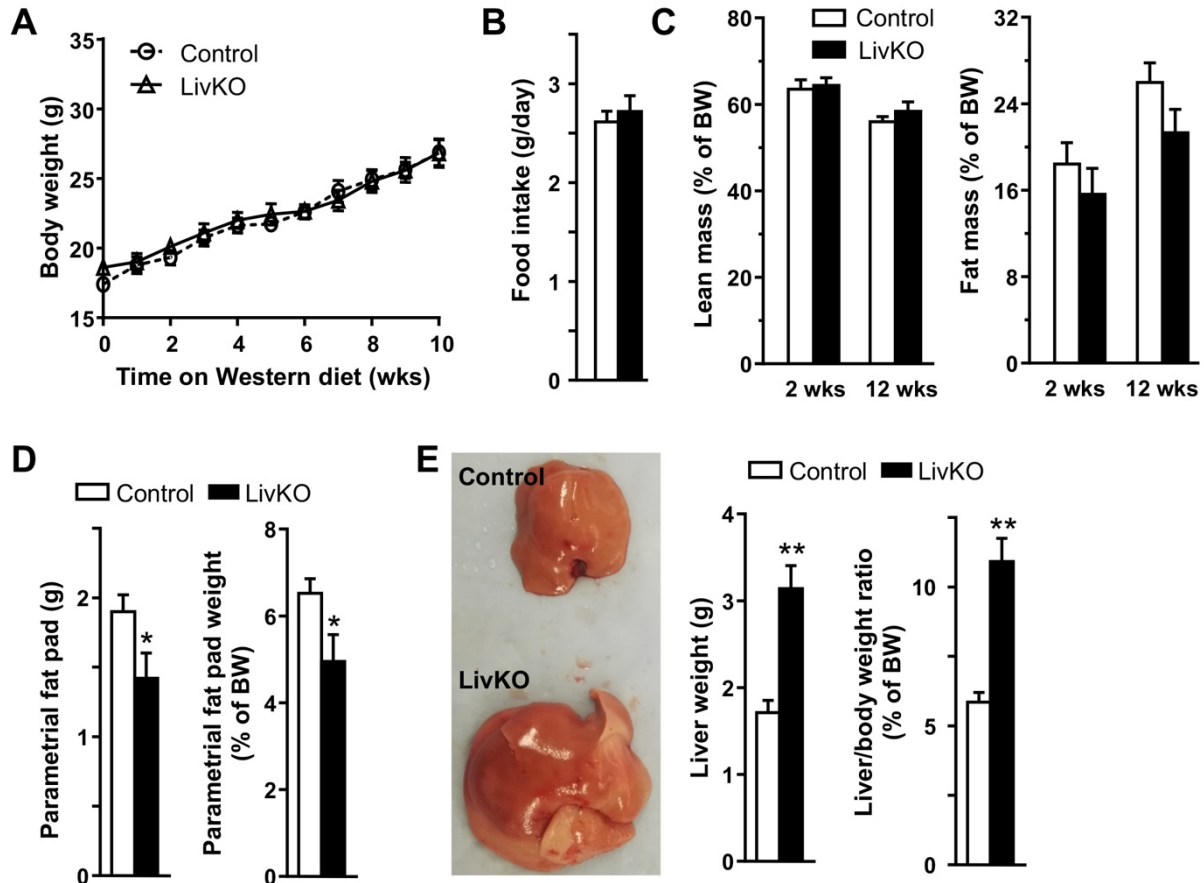

#

**Figure S1.** Liver-specific deletion of CGI-58 causes hepatomegaly in female mice. A: Body weight changes of the mice fed the Western diet starting at 6 weeks of age (n = 6). B: Food intake of the mice on Week 13 of Western diet feeding (n = 6). C: Body composition of the mice fed the Western diet for 2 or 12 weeks (n = 6-8). D: Fat weight and fat-to-body weight ratios of the mice at necropsy (n = 6). E: Gross appearance of liver, liver weight, and liver-to-body weight ratios in the mice at necropsy. \* $P < 0.05$ ; \*\* $P < 0.01$ .

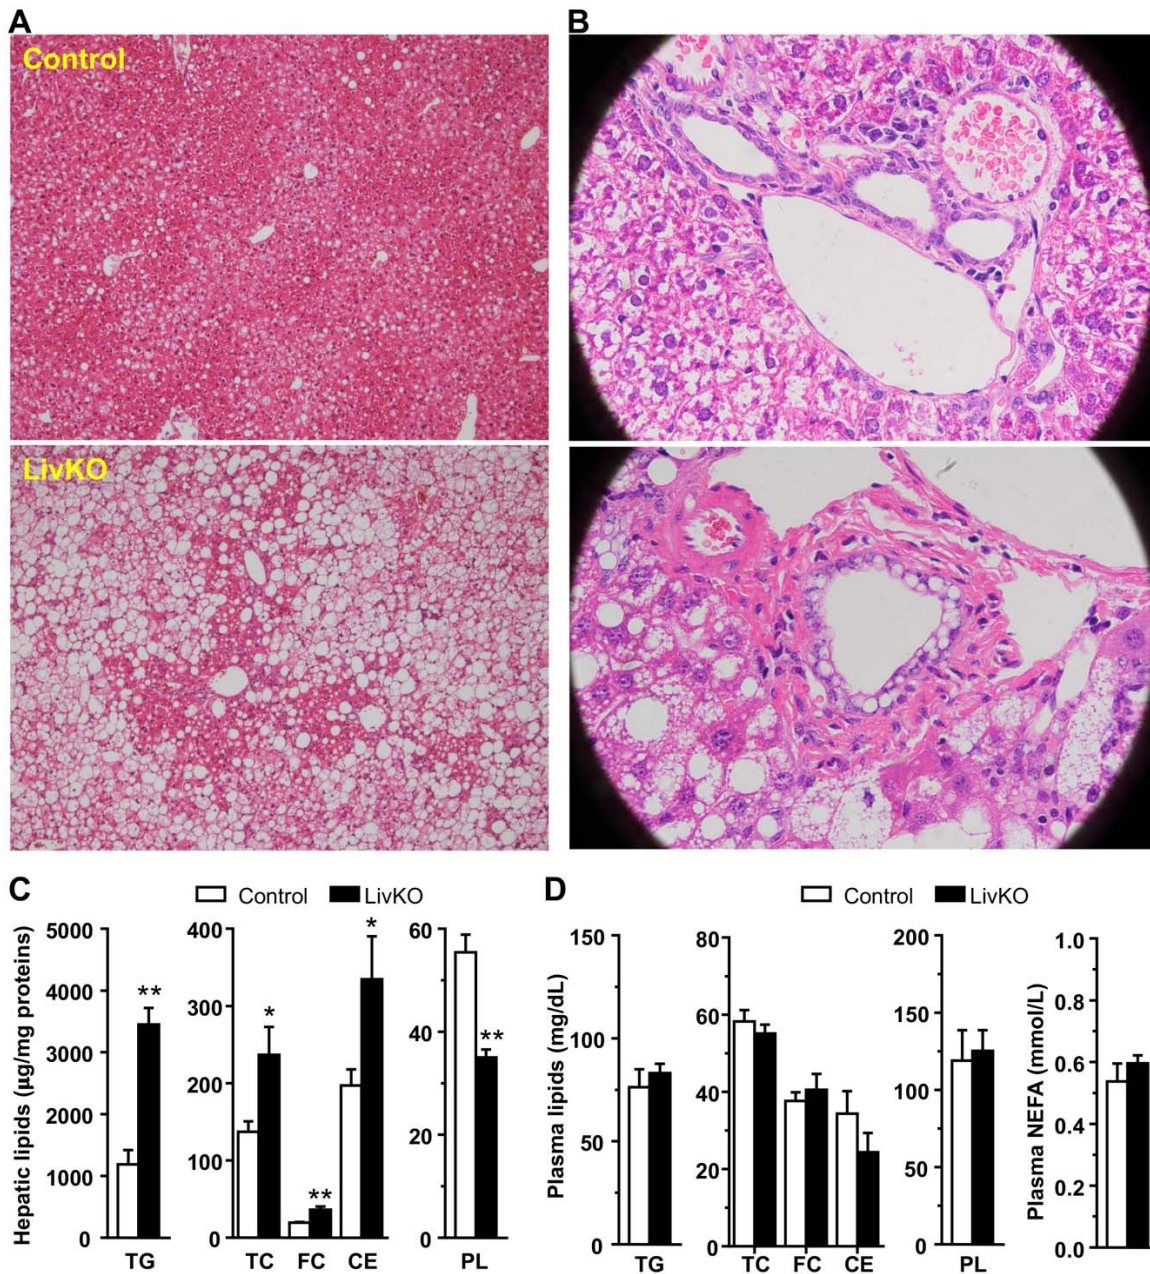

**Figure S2.** Liver-specific deletion of CGI-58 exacerbates hepatic steatosis in female mice fed the Western diet. A,B: H&E staining of liver sections from the mice at necropsy. C: Hepatic contents of triglycerides (TG), cholesterol, and phospholipids (PL) in the mice at necropsy ( $n = 6$ ). The mass of cholesterol ester (CE) was calculated by multiplying the mass difference between total cholesterol (TC) and free cholesterol (FC) by 1.67. D: Plasma concentrations of lipids in the mice at necropsy ( $n = 6$ ). \* $P < 0.05$ ; \*\* $P < 0.01$ .

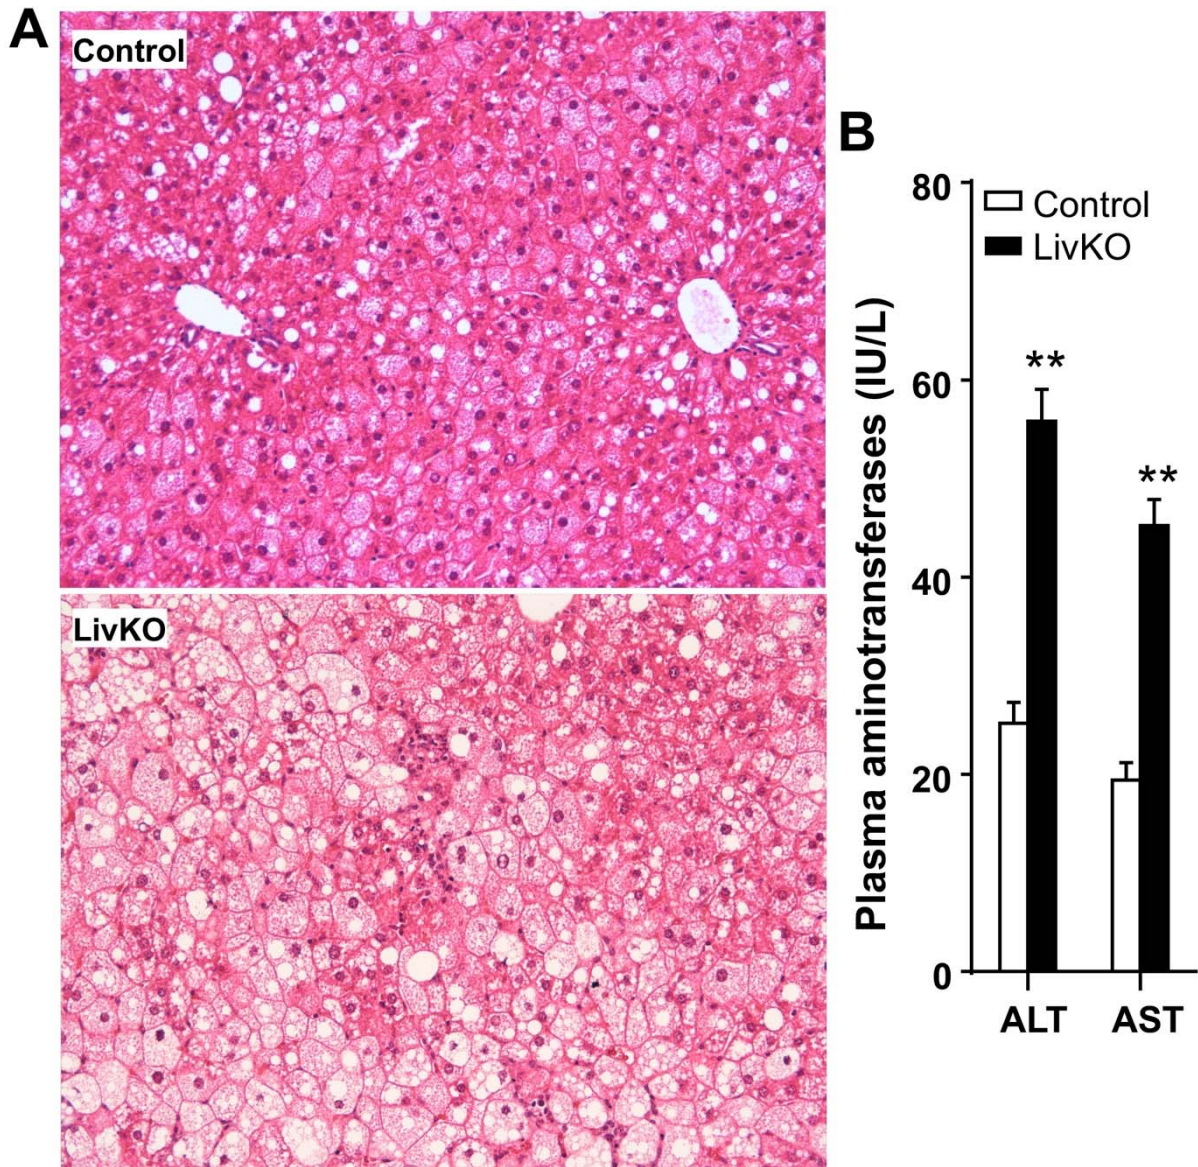

**Figure S3.** NASH in LivKO female mice on the Western diet for 14 weeks starting at 6 weeks. A: H&E staining of liver sections. B: Plasma levels of alanine transaminase (ALT) and aspartate transaminase (AST) (n = 6). \* $P < 0.05$ ; \*\* $P < 0.01$ .

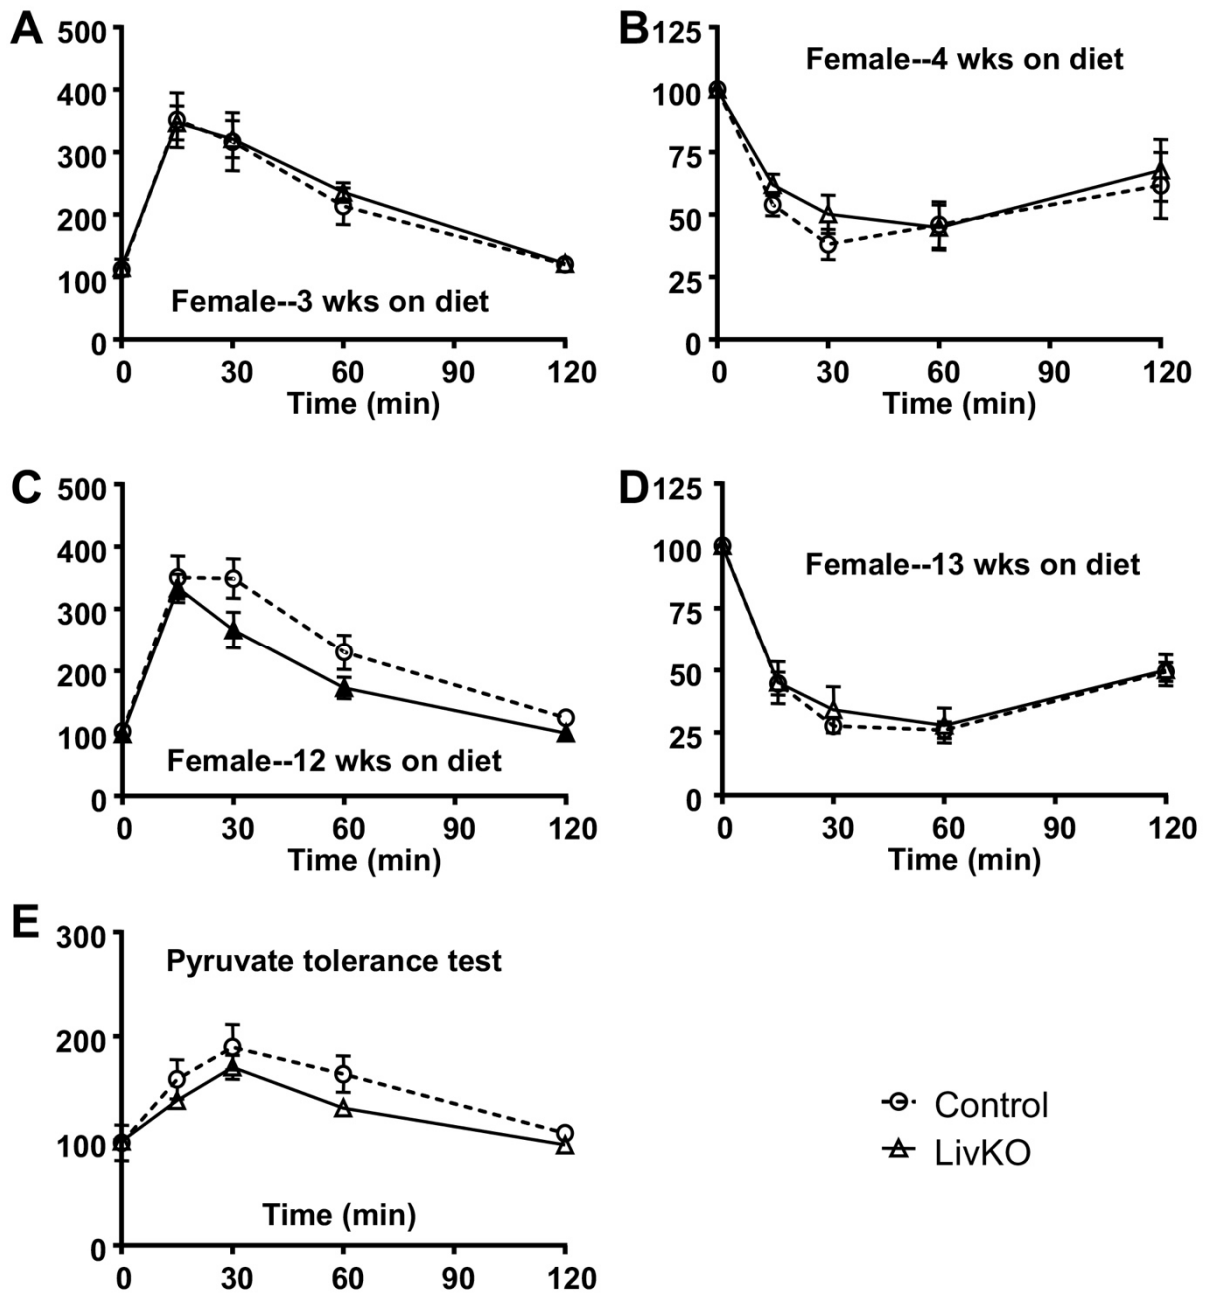

**Figure S4.** Liver-specific deletion of CGI-58 does not affect systemic glucose tolerance and insulin sensitivity in female mice. A,B: GTT and ITT in the mice fed the Western diet for 3 and 4 weeks, respectively, starting at 6 weeks of age (n = 6-8). C,D: GTT and ITT in the mice on the Western diet for 12 and 13 weeks, respectively (n=6-8). E: PTT in the mice fed the Western diet for 13 weeks and fasted for 16 h (n = 6-8). \* $P < 0.05$  and \*\* $P < 0.01$  (control vs. LivKO at each time point).
